# Supplementary material for: Fatigue – a symptom in endometriosis
Source: Oxford University Press journal article supplement (doi:10.1093/humrep/dey115), 2018-05-14
Supplement: dey115-supplementary.pdf [file dey115-supplementary.pdf]

860

805 **Sub-Analysis Pain**

865

|     |                                                                                                   |                 |     |
|-----|---------------------------------------------------------------------------------------------------|-----------------|-----|
|     | (i) <b>Prevalence of Fatigue</b>                                                                  |                 |     |
|     | <b>All women:</b>                                                                                 |                 |     |
| 810 | Prevalence Fatigue <b>all women:</b>                                                              |                 |     |
|     | Endometriosis                                                                                     | Control         |     |
|     | N = 554                                                                                           | N = 548         |     |
|     | N = 281 (50.7%)                                                                                   | N = 123 (22.4%) | 870 |
| 815 | Prevalence Fatigue <b>all women</b> without confounding effects <sup>1</sup> :                    |                 |     |
|     | Endometriosis                                                                                     | Control         |     |
|     | N = 46                                                                                            | N = 77          |     |
|     | N = 10 (21.7%)                                                                                    | N = 7 (7.5%)    | 875 |
| 820 | <b>Women without pain:</b>                                                                        |                 |     |
|     | Prevalence Fatigue women <b>without pain:</b>                                                     |                 |     |
|     | Endometriosis                                                                                     | Control         |     |
|     | N 243                                                                                             | N = 480         | 880 |
|     | N = 81 (33.3%)                                                                                    | N = 92 (19.1%)  |     |
| 825 | Prevalence Fatigue women <b>without pain</b> without confounding effects <sup>1</sup> :           |                 |     |
|     | Endometriosis                                                                                     | Control         |     |
|     | N = 42                                                                                            | N = 76          | 885 |
|     | N = 7 (16.6%)                                                                                     | N = 6 (7.9%)    |     |
| 830 | <b>Women with pain:</b>                                                                           |                 |     |
|     | Prevalence Fatigue women <b>with pain:</b>                                                        |                 |     |
|     | Endometriosis                                                                                     | Control         |     |
|     | N = 317                                                                                           | N = 82          | 890 |
|     | N = 205 (64.7%)                                                                                   | N = 34 (41.5%)  |     |
| 835 | Prevalence Fatigue women <b>with pain</b> without confounding effects <sup>1</sup> :              |                 |     |
|     | Endometriosis                                                                                     | Control         |     |
|     | N = 15                                                                                            | N = 9           | 895 |
|     | N = 3 (20%)                                                                                       | N = 1 (11.1%)   |     |
| 840 | <sup>1</sup> Confounding effects: depression, BMI, insomnia, nulliparous and occupational stress. |                 |     |

900

|     |                                                                                                               |                         |                |                                |                |
|-----|---------------------------------------------------------------------------------------------------------------|-------------------------|----------------|--------------------------------|----------------|
|     | (ii) <b>Association chronic pain and fatigue:</b>                                                             |                         |                |                                |                |
|     | <b>Chronic pain</b>                                                                                           | <b>Frequent fatigue</b> |                |                                |                |
| 845 |                                                                                                               | <b>Crude OR</b>         | <b>P-value</b> | <b>Adjusted OR<sup>2</sup></b> | <b>P-value</b> |
|     |                                                                                                               | 5.09 (3.88; 6.67)       | <0.001         | 2.22 (1.52; 3.23)              | <0.001         |
| 850 | → Pain is associated with fatigue but fatigue is always higher in the endometriosis group, even without pain. |                         |                |                                |                |

905

<sup>2</sup>Adjusted for endometriosis, BMI, chronic pain, insomnia, depression, motherhood and occupational stress.

910
